# Supplementary material for: Distinct gastric phenotype in patients with pathogenic variants in SMAD4: A nationwide cross-sectional study
Source: PubMed Central journal article supplement (PMC9754866; doi:10.1055/a-1954-0522), 2022-12-15
Supplement: 2768supmat_10-1055-a-1954-0522.pdf [file 2768supmat_10-1055-a-1954-0522.pdf]

## Supplementary material

Supplementary Table 1

Predisposing variants in *SMAD4*

| Family nr. | Variant <sup>1</sup>                   |                    | Classification <sup>2</sup> | Exon number <sup>1</sup> | Type                      |
|------------|----------------------------------------|--------------------|-----------------------------|--------------------------|---------------------------|
| I          | c.1156G>A                              | p.(Gly386Ser)      | Likely pathogenic           | Exon 10                  | Missense                  |
| II         | t(1;18)(p36.1;q21.1)                   |                    |                             |                          | Chromosomal translocation |
| III        | c.723_730del                           | p.(Gly243Alafs*18) | Pathogenic                  | Exon 6                   | Frameshift                |
| IV         | c.1325_1326del                         | p.(Gln442Leufs*51) | Pathogenic                  | Exon 11                  | Frameshift                |
| V          | c.1245_1248del                         | p.(Asp415Glufs*20) | Pathogenic                  | Exon 10                  | Frameshift                |
| VI         | c.1421del                              | p.(Ser474Ter)      | Pathogenic                  | Exon 11                  | Nonsense                  |
| VII        | del (c.955+1_956-1)(1308+1_1309-1)del) | p.(Ala319Glyfs*3)  | Pathogenic                  | Exon 9-10                | Frameshift                |
| VIII       | c.330dupA                              | p.(His111Thrfs*3)  | Pathogenic                  | Exon 3                   | Frameshift                |
| IX         | c.1081C>T                              | p.(Arg361Cys)      | Pathogenic                  | Exon 9                   | Missense                  |
| X          | c.1245_1248del                         | p.(Asp415Glufs*20) | Pathogenic                  | Exon 10                  | Frameshift                |
| XI         | c.1587dup                              | p.(His530Thrfs*47) | Pathogenic                  | Exon 12                  | Frameshift                |
| XII        | c.939del                               | p.(Ile314Phefs*22) | Pathogenic                  | Exon 8                   | Frameshift                |
| XIII       | c.692dup                               | p.(Ser232Glufs*3)  | Pathogenic                  | Exon 6                   | Frameshift                |
| XIV        | c.1448-1G >A                           | p.?                | Likely pathogenic           | Intron 11                | Splice site               |
| XV         | c.831_832del                           | p.(Pro278Ter)      | Pathogenic                  | Exon 7                   | Nonsense                  |

1. NM\_005359.5

2. According to ACMG standards and guidelines (*Richards et al. 2015*)
